# Supplementary material for: Effects of Qingluo Tongbi Decoction on Gut Flora of Rats with Adjuvant-Induced Arthritis and the Underlying Mechanism
Source: Hindawi journal article supplement (doi:10.1155/2019/6308021), 2019-08-18
Supplement: f1 [file 6308021.f1.pdf]

## Supplement

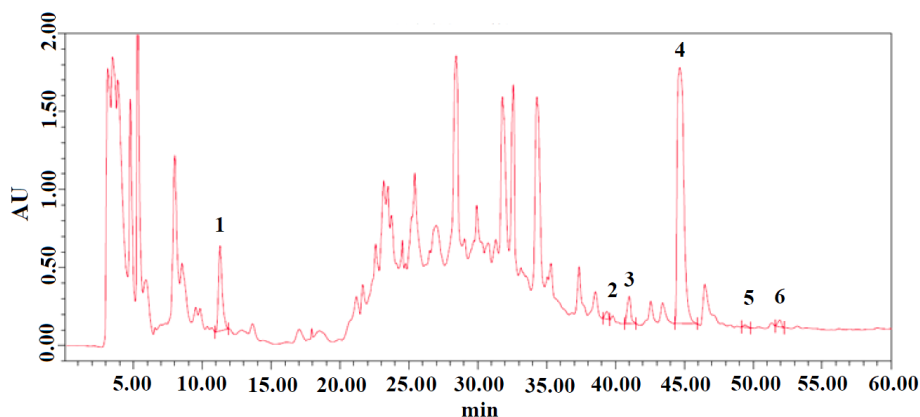

| Peak number | Herb                                         | Hallmark of ingredient | Retention time (min) | Percentage of area (%) | Concentration (mg/ml) |
|-------------|----------------------------------------------|------------------------|----------------------|------------------------|-----------------------|
| 1           | <i>Rehmannia glutinosa</i> (Gaertn) Li-bosch | Catalpol               | 11.295               | 14.65                  | 0.7441                |
| 2           | <i>Panax notoginseng</i> (Burk.) F.H.Chen    | Notoginseng saponin R1 | 39.374               | 1.13                   | 0.1383                |
| 3           | <i>Panax notoginseng</i> (Burk.) F.H.Chen    | Ginsenoside Rg1        | 41.005               | 4.55                   | 0.4931                |
| 4           | <i>Sinomenium acutum</i>                     | Sinomenine             | 44.677               | 78.15                  | 0.5086                |
| 5           | <i>Tripterygium wilfordii</i> Hook.f.        | Triptolide             | 49.398               | 0.39                   | 0.0136                |
| 6           | <i>Panax notoginseng</i> (Burk.) F.H.Chen    | Ginsenoside Rb1        | 51.932               | 1.12                   | 0.1551                |

**Figure S1.** Representative chromatogram of major compounds marked by six main identified compounds originated from the four herbs in QLT.

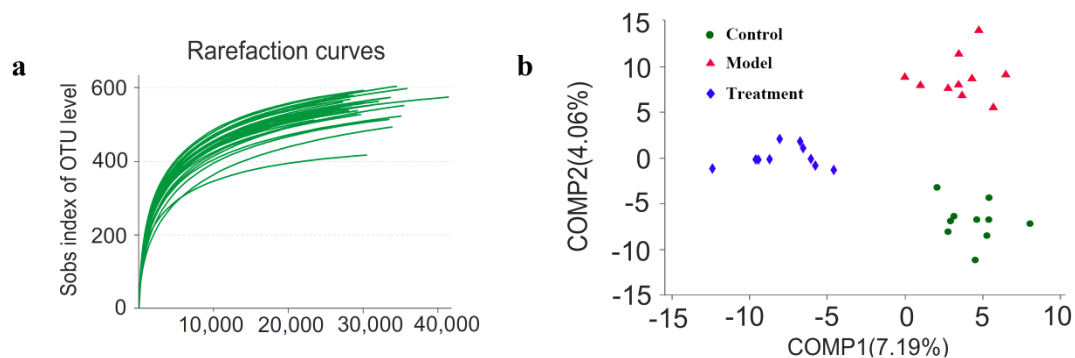

**Figure S2.** The diversity of gut flora. The rarefaction curves showed that the sequencing depth was enough to obtain the total gut flora (a). Beta diversity analysis presented the significant differences of gut flora among the three groups, and each point represented individual rat (b).

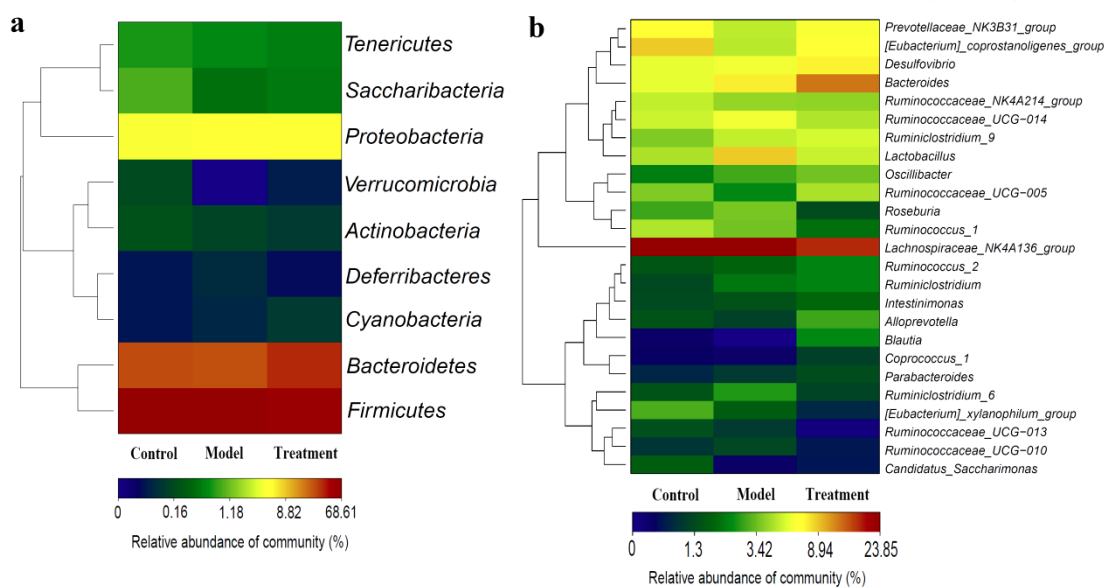

**Figure S3.** The community structure of the gut flora in the three group. The phylum-level community structure of gut flora was presented by heatmap (a). The relative abundances of top 50 genera in gut flora were presented by heatmap (b).

**Table S1.** The predictive functions related to QLT treatment in AA rats

| <b>ID</b> | <b>Predictive function</b>                                                                                                                                                        | Control group | Model group | Treatment group | $Z(P)^a$     | $Z(P)^b$     | $Z(P)^c$     | $H(P)^d$      |
|-----------|-----------------------------------------------------------------------------------------------------------------------------------------------------------------------------------|---------------|-------------|-----------------|--------------|--------------|--------------|---------------|
| 2272      | Aminoglycoside                                                                                                                                                                    | 0.66±0.20     | 0.93±0.40   | 0.62±0.23       | 2.117(0.034) | 1.972(0.049) | 0.141(0.888) | 5.601(0.061)  |
| 507       | anthranilate synthase                                                                                                                                                             | 3.51±0.18     | 3.16±0.22   | 3.40±0.24       | 3.250(0.001) | 2.113(0.035) | 1.408(0.159) | 11.358(0.003) |
| 484       | ATP-binding protein                                                                                                                                                               | 10.88±0.45    | 10.35±0.44  | 10.85±0.47      | 2.343(0.019) | 2.394(0.017) | 0.211(0.833) | 7.566(0.023)  |
| 2379      | Bacterioferritin-associated ferredoxin                                                                                                                                            | 0.01±0.00     | 0.02±0.02   | 0.01±0.01       | 2.192(0.028) | 1.972(0.049) | 0.000(1.000) | 5.810(0.055)  |
| 1557      | Bidirectionally degrades single-stranded DNA into large acid-insoluble oligonucleotides, which are then degraded further into small acid-soluble oligonucleotides (By similarity) | 2.49±0.33     | 2.73±0.29   | 2.43±0.30       | 2.192(0.028) | 2.042(0.041) | 0.211(0.833) | 6.051(0.049)  |
| 1992      | Catalyzes the conversion of L-arabinose to L-ribulose (By similarity)                                                                                                             | 1.40±0.19     | 1.57±0.13   | 1.39±0.24       | 2.192(0.028) | 2.253(0.024) | 0.070(0.944) | 6.647(0.036)  |
| 65        | Catalyzes the isomerization between 2-isopropylmalate and 3-isopropylmalate, via the formation of 2-isopropylmaleate (By similarity)                                              | 4.99±0.13     | 4.95±0.30   | 4.98±0.12       | 2.343(0.019) | 2.605(0.009) | 0.211(0.833) | 8.301(0.016)  |
| 735       | Catalyzes the NADP-dependent rearrangement and reduction of 1-deoxy-D-xylulose-5-phosphate (DXP) to 2-C-methyl-D-erythritol 4-phosphate (MEP) (By similarity)                     | 4.18±0.21     | 3.94±0.20   | 4.17±0.17       | 2.192(0.028) | 2.324(0.02)  | 0.141(0.888) | 6.869(0.032)  |
| 1691      | CRISPR-associated autoregulator DevR family                                                                                                                                       | 0.00±0.00     | 0.01±0.01   | 0.00±0.00       | 2.570(0.010) | 2.932(0.003) | 0.635(0.526) | 10.477(0.005) |
| 2602      | cytoplasmic protein                                                                                                                                                               | 0.01±0.00     | 0.02±0.02   | 0.01±0.01       | 2.192(0.028) | 1.972(0.049) | 0.000(1.000) | 5.810(0.055)  |
| 3101      | Death-On-Curing Family                                                                                                                                                            | 0.67±0.20     | 0.86±0.24   | 0.62±0.22       | 2.041(0.041) | 1.972(0.049) | 0.070(0.944) | 5.402(0.067)  |
| 4170      | DNA alkylation repair enzyme                                                                                                                                                      | 3.40±0.22     | 3.16±0.21   | 3.52±0.47       | 2.343(0.019) | 2.183(0.029) | 0.423(0.673) | 6.993(0.030)  |
| 1001      | Facilitates transcription termination by a mechanism that involves Rho binding to the nascent RNA, activation of                                                                  | 3.23±0.21     | 2.95±0.27   | 3.24±0.31       | 2.343(0.019) | 1.972(0.049) | 0.070(0.944) | 6.224(0.045)  |

---

|      |                                                                                                                                                                                                                                                                 |           |           |           |              |              |              |               |
|------|-----------------------------------------------------------------------------------------------------------------------------------------------------------------------------------------------------------------------------------------------------------------|-----------|-----------|-----------|--------------|--------------|--------------|---------------|
|      | Rho's RNA-dependent ATPase activity, and release of the mRNA from the DNA template (By similarity)                                                                                                                                                              |           |           |           |              |              |              |               |
| 2628 | Fimbrial assembly family protein                                                                                                                                                                                                                                | 0.02±0.01 | 0.04±0.02 | 0.02±0.01 | 2.268(0.023) | 1.972(0.049) | 0.423(0.673) | 6.169(0.046)  |
| 3235 | Glutathione-dependent formaldehyde-activating Gfa                                                                                                                                                                                                               | 0.01±0.00 | 0.02±0.02 | 0.01±0.01 | 2.646(0.008) | 2.042(0.041) | 0.211(0.833) | 7.445(0.024)  |
| 2055 | Isocitrate lyase                                                                                                                                                                                                                                                | 0.01±0.00 | 0.02±0.02 | 0.01±0.01 | 1.965(0.049) | 2.113(0.035) | 0.070(0.944) | 5.606(0.061)  |
| 406  | Key enzyme in heme biosynthesis. Catalyzes the oxidative decarboxylation of propionic acid side chains of rings A and B of coproporphyrinogen III (By similarity)                                                                                               | 0.02±0.01 | 0.03±0.02 | 0.02±0.01 | 2.343(0.019) | 1.972(0.049) | 0.563(0.573) | 6.491(0.039)  |
| 3386 | MazG family                                                                                                                                                                                                                                                     | 3.16±0.43 | 2.77±0.30 | 3.19±0.42 | 2.041(0.041) | 2.183(0.029) | 0.070(0.944) | 6.007(0.050)  |
| 3908 | membrane-associated protein                                                                                                                                                                                                                                     | 1.49±0.43 | 1.88±0.32 | 1.44±0.42 | 2.343(0.019) | 2.394(0.017) | 0.070(0.944) | 7.547(0.023)  |
| 134  | N-(5'-phosphoribosyl)anthranilate isomerase                                                                                                                                                                                                                     | 3.75±0.26 | 3.45±0.18 | 3.73±0.29 | 2.721(0.007) | 2.817(0.005) | 0.211(0.833) | 10.338(0.006) |
| 2585 | nucleoprotein polynucleotide-associated enzyme                                                                                                                                                                                                                  | 0.01±0.00 | 0.02±0.02 | 0.01±0.01 | 2.192(0.028) | 1.972(0.049) | 0.000(1.000) | 5.810(0.055)  |
| 3829 | periplasmic                                                                                                                                                                                                                                                     | 0.01±0.00 | 0.02±0.01 | 0.01±0.01 | 2.343(0.019) | 2.113(0.035) | 0.141(0.888) | 6.645(0.036)  |
| 2430 | protein involved in catabolism of external DNA                                                                                                                                                                                                                  | 0.02±0.01 | 0.03±0.02 | 0.02±0.01 | 2.041(0.041) | 2.113(0.035) | 0.282(0.778) | 5.841(0.054)  |
| 2624 | Removes the pyruvyl group from chorismate, with concomitant aromatization of the ring, to provide 4-hydroxybenzoate (4HB) for the ubiquinone pathway (By similarity)                                                                                            | 0.01±0.00 | 0.02±0.02 | 0.01±0.01 | 2.192(0.028) | 1.972(0.049) | 0.000(1.000) | 5.810(0.055)  |
| 1368 | ribonuclease                                                                                                                                                                                                                                                    | 3.21±0.23 | 2.94±0.26 | 3.18±0.22 | 2.117(0.034) | 2.113(0.035) | 0.423(0.673) | 6.101(0.047)  |
| 1583 | saccharopine dehydrogenase                                                                                                                                                                                                                                      | 3.73±0.44 | 3.30±0.31 | 3.70±0.48 | 2.419(0.016) | 2.113(0.035) | 0.352(0.725) | 6.993(0.030)  |
| 2627 | sterol-binding domain protein                                                                                                                                                                                                                                   | 0.01±0.00 | 0.02±0.02 | 0.01±0.01 | 2.192(0.028) | 1.972(0.049) | 0.000(1.000) | 5.810(0.055)  |
| 2410 | the catalytic subunit of succinate dehydrogenase (SDH). SDH is involved in complex II of the mitochondrial electron transport chain and is responsible for transferring electrons from succinate to ubiquinone (coenzyme Q). In is unclear whether it participa | 0.01±0.01 | 0.03±0.02 | 0.02±0.01 | 2.192(0.028) | 1.972(0.049) | 0.352(0.725) | 5.910(0.052)  |

---

|      |                                         |           |           |           |              |              |              |               |
|------|-----------------------------------------|-----------|-----------|-----------|--------------|--------------|--------------|---------------|
| 1360 | transcriptional regulator AsnC family   | 6.95±0.26 | 6.61±0.33 | 7.00±0.38 | 2.268(0.023) | 2.324(0.02)  | 0.000(1.000) | 7.088(0.029)  |
| 4223 | type IV pilus modification protein PilV | 0.04±0.02 | 0.07±0.03 | 0.03±0.03 | 2.419(0.016) | 2.676(0.007) | 1.549(0.121) | 10.007(0.007) |
| 2850 | UPF0249 protein                         | 0.77±0.19 | 0.91±0.18 | 0.72±0.21 | 2.041(0.041) | 2.042(0.041) | 0.493(0.622) | 5.703(0.058)  |
| 3755 | UPF0754 membrane protein                | 0.03±0.01 | 0.04±0.01 | 0.02±0.01 | 2.041(0.041) | 3.098(0.002) | 1.620(0.105) | 11.054(0.004) |

a, model group vs control group; b, treatment group vs model group; c, treatment group vs control group; d, comparison among the three groups.
